# Supplementary material
Source: PubMed Central journal article supplement (PMC6719340)

### Alignment of Armet and Armet-L1 proteins

\* Armet-L1, \*\* Armet

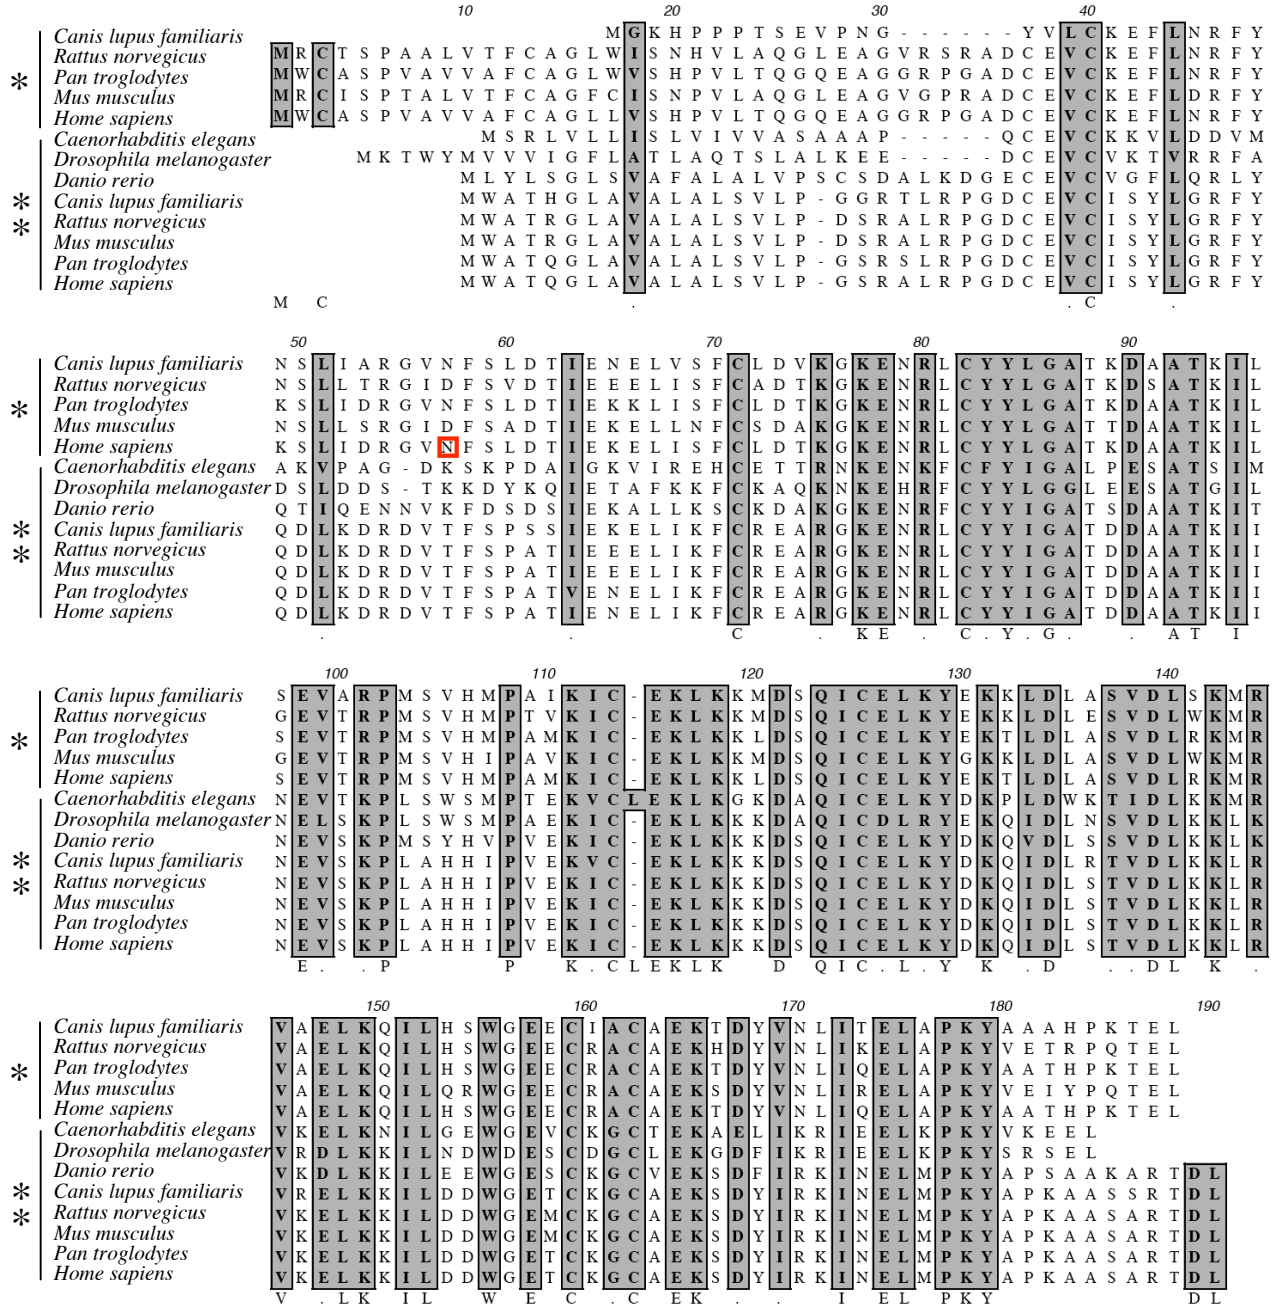

Supplement: NIHMS1047769-supplement-1.pdf [file NIHMS1047769-supplement-1.pdf]
